# Supplementary material
Source: ML conference proceedings conference paper supplement (https://proceedings.neurips.cc/paper_files/paper/2020/hash/7d265aa7147bd3913fb84c7963a209d1-Abstract.html)
Supplement: Supplementary file 3 [file ihdp_covariates.xlsx]

## Sheet: Sheet1
Name	Meaning from Hill's notes	Notes	Group				baby
iqsb.36	IQ	outcome	n/a				socioeconomic
dose400	treatment		n/a				location
bw	birth weight		baby_health				mom_age
momage	mom age		mom_age				mom_preg
nnhealth	"neo-natal health index" some function of birth variables (number of days in hospital and gestational age..) that supposed to measure neonatal health		baby_health				others
birth.o	birth order		mom_preg
parity	number of children the mother has given birth to		mom_preg
moreprem	number of other children mom has given birth to prematurely		mom_preg
cigs	did she smoke		mom_preg
alcohol	did she drink		mom_preg
ppvt.imp	mother’s ppvt measured 1 year post-birth (some values imputed)	I don't know what ppvt is. I googled it's some test they do on kids so that doesn't make sense	others
bwg	No idea what this is!	It's an indicator variable	others
female			female
mlt.birt	Number of multiple births mother has had		mom_preg
b.marry	Is mom married		mom_social
livwho	what family member does the child primarily live with	weird because it's encoded by numbers (1,2,3,4) and no idea what decoding is	others
language	primary language spoken at home	weird because it's encoded by numbers (1,2,3,4) and no idea what decoding is	others
whenpren	what trimester did the mother begin prenatal		mom_preg
drugs	did she take drugs		mom_preg
othstudy	was the family participating in another study		others
mom.lths	mom ed		mom_ed
mom.hs	mom ed		mom_ed
mom.coll	mom ed		mom_ed
mom.scoll	mom ed	maybe? What is scoll?	mom_ed
site1			loc
site2			loc
site3			loc
site4			loc
site5			loc
site6			loc
site7			loc
site8			loc
momblack			mom_race
momhisp			mom_race
momwhite			mom_race
workdur.imp	indicator for whether mom worked during her pregnancy		mom_preg
