# Supplementary material
Source: ML conference proceedings conference paper supplement (https://proceedings.neurips.cc/paper_files/paper/2020/hash/7d265aa7147bd3913fb84c7963a209d1-Abstract.html)
Supplement: Supplementary file 5 [file covariates_dbp.xlsx]

## Sheet: Sheet1
Name	Meaning from Hill's notes	Notes	Group	Group2
white			race	socioeconomic
black			race	socioeconomic
hisp			race	socioeconomic
female			gender
age_mo			age
hhsize			social	socioeconomic
edu			education	socioeconomic
married			social	socioeconomic
widowed			social	socioeconomic
divorced			social	socioeconomic
separated			social	socioeconomic
income			wealth	socioeconomic
packyr			habits	socioeconomic
bmi			bloodwork
pulse			bloodwork
sodium			bloodwork
potassium			bloodwork
r_sodipota			bloodwork
alcohol			habits	socioeconomic
insurance			wealth	socioeconomic
together			social	socioeconomic
ave_dbp			n/a
trt_dbp			na
